# Supplementary material
Source: PubMed Central journal article supplement (PMC9053222)
Supplement: 43856_2022_86_MOESM3_ESM.pdf [file 43856_2022_86_MOESM3_ESM.pdf]

## Description of Additional Supplementary Files

**File Name:** Supplementary Data 1

**Description:** **Supplementary Data** contains the following **Supplementary Tables** in a single Excel (.xlsx) file.

**Table S1.** Parsimonious transcriptomic signatures included in panel and signature score calculation

**Table S2.** TaqMan PCR primer-probe panel for Darboe11 (RISK11) Fluidigm 96.96 gene expression integrated fluidic circuit

**Table S3.** TaqMan PCR primer-probe panel for Fluidigm 192.24 gene expression integrated fluidic circuit and assay qualification

**Table S4.** Penn-Nicholson6 (RISK6) signature score calculation

**Table S5.** Suliman4 (RISK4) signature score calculation

**Table S6.** Thompson5 (RESPONSE5) signature score calculation

**Table S7.** Diagnostic performance of transcriptomic signatures in CTBC cohort

**Table S8.** Baseline characteristics of enrolled CORTIS-01 study cohort and tuberculosis endpoints

**Table S9.** Baseline characteristics of enrolled CORTIS-HR study cohort and tuberculosis endpoints

**Table S10.** Primary endpoint diagnostic performance of transcriptomic signatures in CORTIS-01 cohort

**Table S11.** Primary endpoint diagnostic performance of transcriptomic signatures in CORTIS-HR cohort

**Table S12.** Primary endpoint prognostic performance of transcriptomic signatures in CORTIS-01 cohort

**Table S13.** Primary endpoint prognostic performance of transcriptomic signatures in CORTIS-HR cohort

**Table S14.** Baseline characteristics of screened CORTIS-01 study participants enrolled in the respiratory pathobionts sub-study

**Table S15.** CTBC cohort signature scores and metadata

**Table S16.** CORTIS-01 sub-study cohort signature scores and metadata

**Table S17.** CORTIS-HR sub-study cohort signature scores and metadata

**Table S18.** CORTIS-01 Respiratory Pathogens sub-study cohort signature scores and metadata
